# Supplementary material for: Engineered human brown adipocyte microtissues improved glucose and insulin homeostasis in high fat diet-induced obese and diabetic mice
Source: bioRxiv or medRxiv preprint supplement (doi:10.1101/2021.10.11.463939), 2021-10-12
Supplement: Supplementary file [file media-1.pdf]

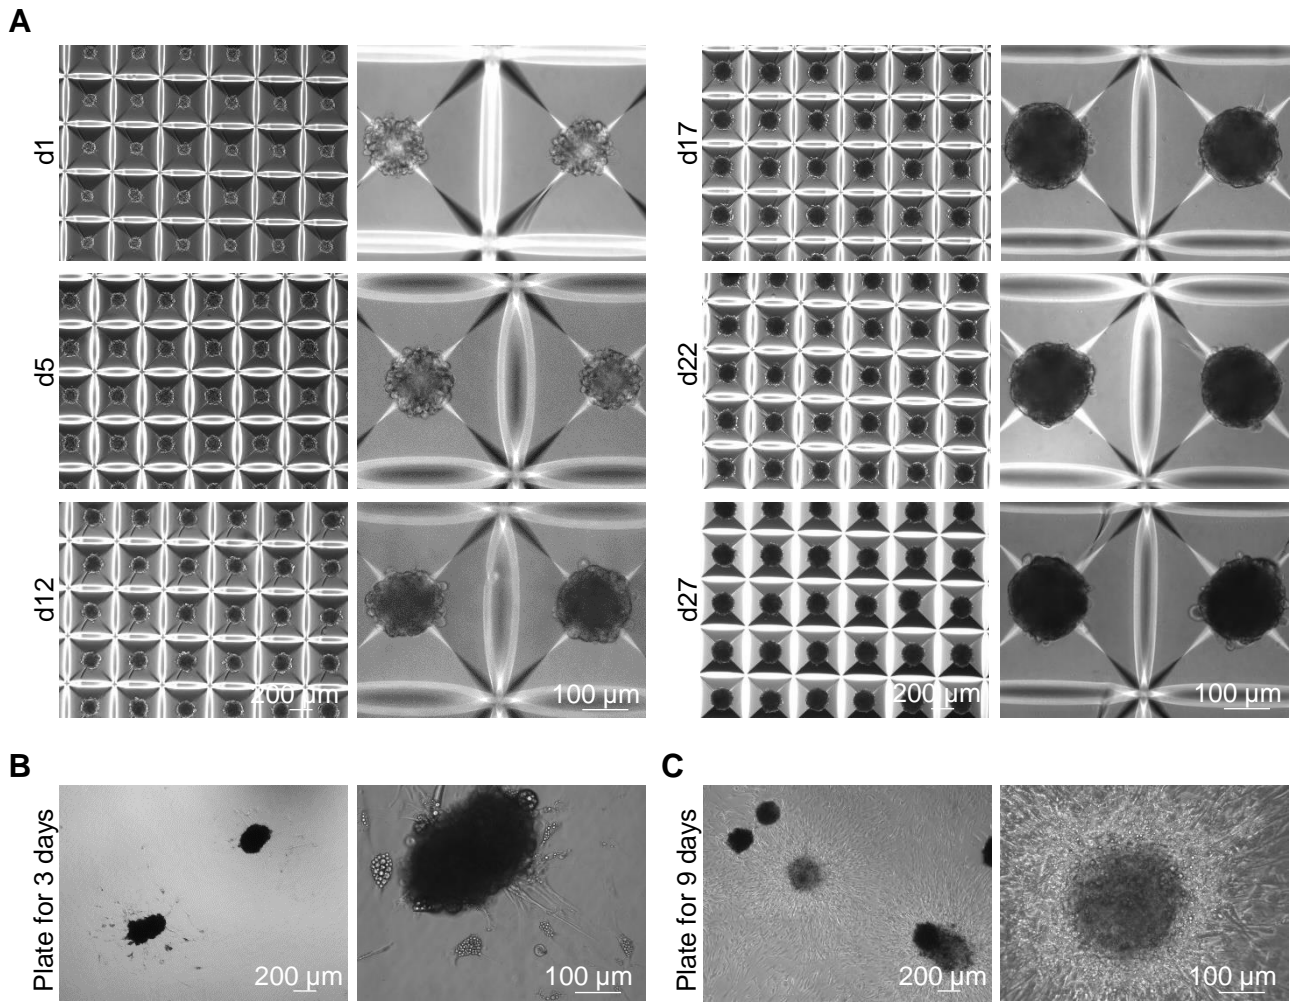

**Figure S1.** Fabricating BA microtissues. **(A)** Preparing BA microtissues in microwells. Phase images day-27 BA microtissues after plating on 2D surface for 3 days **(B)** and 9 days **(C)**.

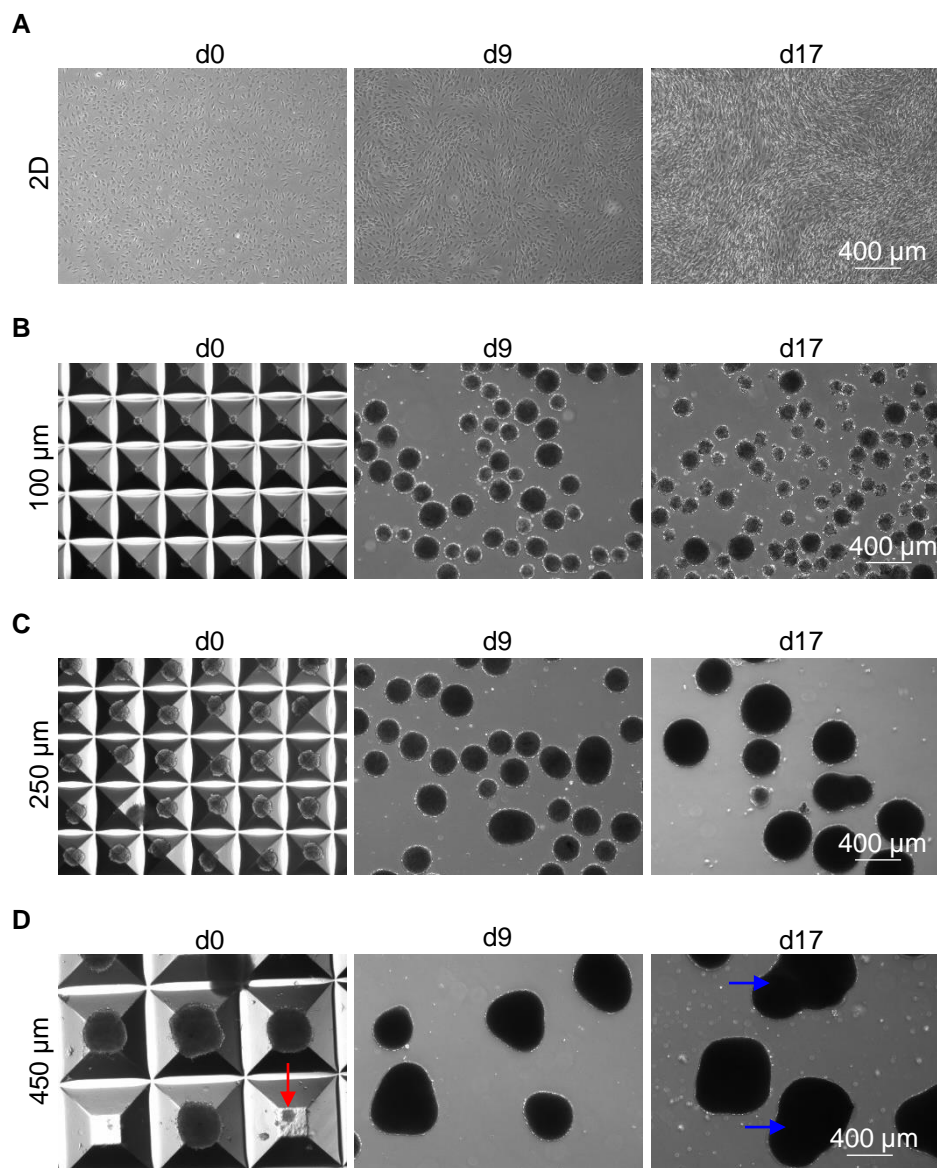

**Figure S2.** Preparing BAs in 2D culture (A) or microwells with varied aggregate sizes (B, C, D). Day 9 and Day 17 microtissues were released from microwells before imaging.

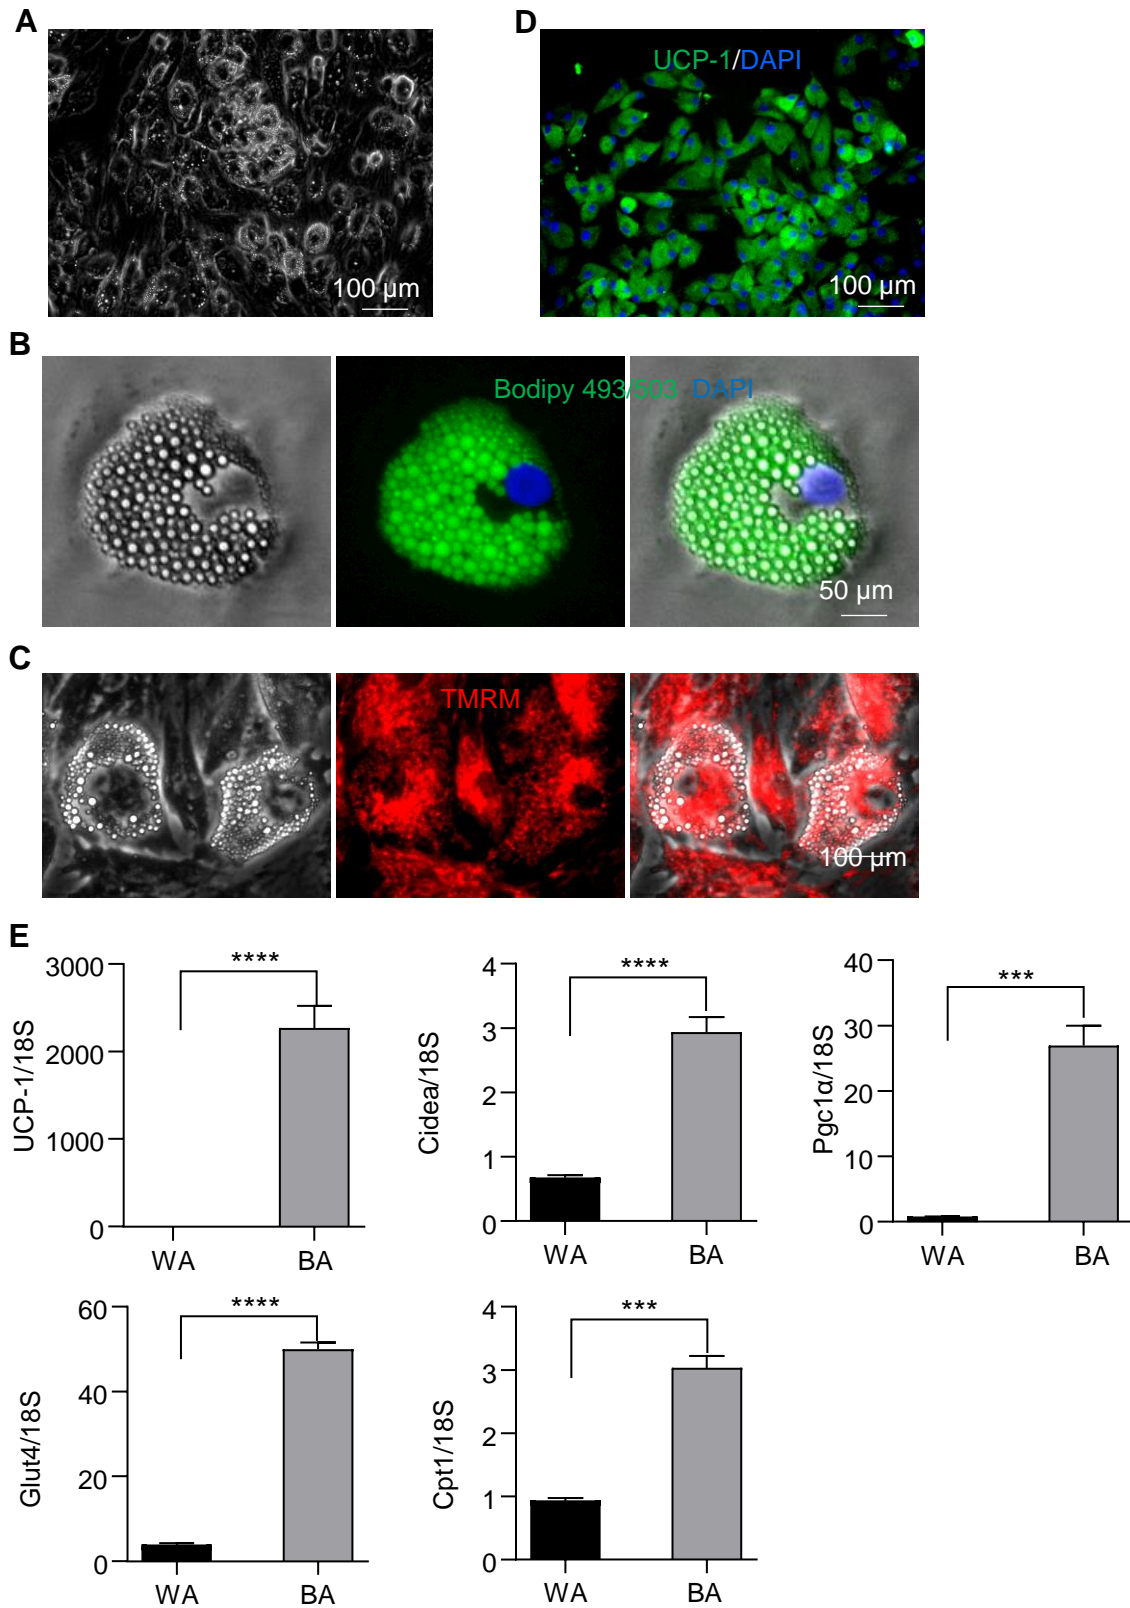

**Figure S3.** Characterization of BA microtissues. BAs prepared in 3D had typical BA phenotypes such as large numbers of small lipid droplets (**A**, **B**), abundant mitochondria (**C**) and UCP-1 proteins (**D**). They expressed BA-specific genes at high level (**E**). WA and BA: adipocytes differentiated from human WAPs and BAPs in microwells. TMRM: Tetramethylrhodamine, methyl ester (mitochondrial probe). Data are represented as mean  $\pm$  SEM (n=3). \*\*\*\*p < 0.0001 \*\*\*p < 0.001

**Table S1.** Antibodies used in this study.

| Antibody                                    | Supplier                     | Catalog. No | Host species | Dilution |
|---------------------------------------------|------------------------------|-------------|--------------|----------|
| Anti-UCP1                                   | abcam                        | ab155117    | Rabbit       | 1:50     |
| Tyrosine Hydroxylase (TH)                   | Fisher scientific            | AB152MI     | Rabbit       | 1:50     |
| CD31                                        | abcam                        | ab24590     | Mouse        | 1:250    |
| Anti-UCP1                                   | abcam                        | ab23841     | Rabbit       | 1:250    |
| Anti-Human Nuclear Antigen antibody [235-1] | abcam                        | ab191181    | Mouse        | 1:100    |
| Secondary Antibody                          | Thermo Fisher                | A-21202     | Donkey       | 1:500    |
| Secondary Antibody                          | Thermo Fisher                | A-21207     | Donkey       | 1:500    |
| Secondary Antibody                          | Jackson Immuno Research Labs | 715585150   | Donkey       | 1:500    |
| Secondary Antibody                          | Jackson Immuno Research Labs | 711545152   | Donkey       | 1:500    |

**Table S2.** One-way ANOVA multiple comparisons test results of mean UCP-1 intensities for day 17 BA in Figure 1D. \*p < 0.05 , \*\*\*\*p < 0.0001.

|             | Control | 2D BA | 100 $\mu$ m | 250 $\mu$ m | 450 $\mu$ m |
|-------------|---------|-------|-------------|-------------|-------------|
| Control     |         |       |             |             |             |
| 2D BA       | ****    |       |             |             |             |
| 100 $\mu$ m | ****    | ****  |             |             |             |
| 250 $\mu$ m | ****    | ****  | ****        |             |             |
| 450 $\mu$ m | ****    | ****  | ****        | *           |             |

**Table S3.** Two-way ANOVA multiple comparisons test results of body weight gain (A), fat mass (B), lean mass (C), fasting glucose (D), GTT (E) and ITT (F) in Figure 3. \*p < 0.05, \*\*p < 0.01, \*\*\*p < 0.001, \*\*\*\*p < 0.0001.

**A**

| Tukey's multiple comparisons test (weight) | WT NCD | WT HFD | Rag1 <sup>-/-</sup> NCD | Rag1 <sup>-/-</sup> HFD | Rag1 <sup>-/-</sup> HFD+BAT |
|--------------------------------------------|--------|--------|-------------------------|-------------------------|-----------------------------|
| WT NCD                                     |        |        |                         |                         |                             |
| WT HFD                                     | ****   |        |                         |                         |                             |
| Rag1 <sup>-/-</sup> NCD                    | ns     | ****   |                         |                         |                             |
| Rag1 <sup>-/-</sup> HFD                    | ****   | ****   | ****                    |                         |                             |
| Rag1 <sup>-/-</sup> HFD+BAT                | ****   | ns     | ****                    | ****                    |                             |

**B**

| Tukey's multiple comparisons test (fat mass) | WT NCD | WT HFD | Rag1 <sup>-/-</sup> NCD | Rag1 <sup>-/-</sup> HFD | Rag1 <sup>-/-</sup> HFD+BAT |
|----------------------------------------------|--------|--------|-------------------------|-------------------------|-----------------------------|
| WT NCD                                       |        |        |                         |                         |                             |
| WT HFD                                       | ****   |        |                         |                         |                             |
| Rag1 <sup>-/-</sup> NCD                      | ns     | ****   |                         |                         |                             |
| Rag1 <sup>-/-</sup> HFD                      | ****   | ****   | ****                    |                         |                             |
| Rag1 <sup>-/-</sup> HFD+BAT                  | ****   | ns     | ****                    | ****                    |                             |

**C**

| Tukey's multiple comparisons test (lean mass) | WT NCD | WT HFD | Rag1 <sup>-/-</sup> NCD | Rag1 <sup>-/-</sup> HFD | Rag1 <sup>-/-</sup> HFD+BAT |
|-----------------------------------------------|--------|--------|-------------------------|-------------------------|-----------------------------|
| WT NCD                                        |        |        |                         |                         |                             |
| WT HFD                                        | ****   |        |                         |                         |                             |
| Rag1 <sup>-/-</sup> NCD                       | ns     | ****   |                         |                         |                             |
| Rag1 <sup>-/-</sup> HFD                       | ****   | ***    | ****                    |                         |                             |
| Rag1 <sup>-/-</sup> HFD+BAT                   | ****   | ns     | ****                    | ***                     |                             |

**D**

| Tukey's multiple comparisons test (fasting glucose) | WT NCD | WT HFD | Rag1 <sup>-/-</sup> NCD | Rag1 <sup>-/-</sup> HFD | Rag1 <sup>-/-</sup> HFD+BAT |
|-----------------------------------------------------|--------|--------|-------------------------|-------------------------|-----------------------------|
| WT NCD                                              |        |        |                         |                         |                             |
| WT HFD                                              | ns     |        |                         |                         |                             |
| Rag1 <sup>-/-</sup> NCD                             | ns     | ns     |                         |                         |                             |
| Rag1 <sup>-/-</sup> HFD                             | ****   | **     | ****                    |                         |                             |
| Rag1 <sup>-/-</sup> HFD+BAT                         | **     | ns     | ns                      | *                       |                             |

**E**

| Tukey's multiple comparisons test (GTT) | WT NCD | WT HFD | Rag1 <sup>-/-</sup> NCD | Rag1 <sup>-/-</sup> HFD | Rag1 <sup>-/-</sup> HFD+BAT |
|-----------------------------------------|--------|--------|-------------------------|-------------------------|-----------------------------|
| WT NCD                                  |        |        |                         |                         |                             |
| WT HFD                                  | ns     |        |                         |                         |                             |
| Rag1 <sup>-/-</sup> NCD                 | ns     | ns     |                         |                         |                             |
| Rag1 <sup>-/-</sup> HFD                 | ****   | ****   | ****                    |                         |                             |
| Rag1 <sup>-/-</sup> HFD+BAT             | **     | ns     | ns                      | ****                    |                             |

**F**

| Tukey's multiple comparisons test (ITT) | WT NCD | WT HFD | Rag1 <sup>-/-</sup> NCD | Rag1 <sup>-/-</sup> HFD | Rag1 <sup>-/-</sup> HFD+BAT |
|-----------------------------------------|--------|--------|-------------------------|-------------------------|-----------------------------|
| WT NCD                                  |        |        |                         |                         |                             |
| WT HFD                                  | ns     |        |                         |                         |                             |
| Rag1 <sup>-/-</sup> NCD                 | ns     | ns     |                         |                         |                             |
| Rag1 <sup>-/-</sup> HFD                 | *      | ns     | ***                     |                         |                             |
| Rag1 <sup>-/-</sup> HFD+BAT             | ns     | ns     | ns                      | *                       |                             |

**Table S4.** Two-way ANOVA multiple comparisons test results of mouse adipokine antibody array in Figure 6C. \*p < 0.05, \*\*p < 0.01, \*\*\*p < 0.001, \*\*\*\*p < 0.0001.

|                    | Rag1 <sup>-/-</sup> NCD vs. Rag1 <sup>-/-</sup> HFD | Rag1 <sup>-/-</sup> NCD vs. Rag1 <sup>-/-</sup> HFD+BA | Rag1 <sup>-/-</sup> HFD vs. Rag1 <sup>-/-</sup> HFD+BAT |
|--------------------|-----------------------------------------------------|--------------------------------------------------------|---------------------------------------------------------|
| Adiponectin        | ****                                                | ns                                                     | **                                                      |
| ANGPT-L3           | *                                                   | ns                                                     | *                                                       |
| C-Reactive Protein | *                                                   | ns                                                     | ***                                                     |
| ICAM-1             | *                                                   | ns                                                     | ***                                                     |
| IGF-I              | ***                                                 | ns                                                     | ***                                                     |
| IGFBP-3            | ****                                                | ns                                                     | ****                                                    |
| IGFBP-5            | ns                                                  | ns                                                     | *                                                       |
| IGFBP-6            | *                                                   | ns                                                     | *                                                       |
| Lipocalin-2        | **                                                  | ns                                                     | **                                                      |
| Pentraxin 2        | ns                                                  | ns                                                     | *                                                       |
